# Supplementary material for: A hybrid approach to investigating major management factors for effective highway preventive maintenance
Source: Sci Rep. 2024 Oct 26;14:25455. doi: 10.1038/s41598-024-76692-4 (PMC11513046; doi:10.1038/s41598-024-76692-4)
Supplement: Supplementary file 1 — Supplementary Material 1 [file 41598_2024_76692_MOESM1_ESM.xlsx]

## Sheet: Sheet1
5.Public perception mainly reflects the satisfaction of highway users with the effectiveness of preventive maintenance management and the reasonableness of charges.	6.Maintenance staff's awareness of preventive maintenance work has a strong positive effect on maintenance work.	7.A common awareness of preventative maintenance at the various levels of the maintenance sector is beneficial to the management of HPM.	8.The competence of managers is beneficial to the development of HPM work, which mainly includes their professional competence, work experience, spirituality and moral character.		9.Different maintenance management models produce inconsistent conservation results that are critical for decision-making on programmes of maintenance measures and for the conduct of maintenance management.	10.Classification of preventive maintenance sections and identification of maintenance measures based on different road diseases to meet the needs of HPM.	11.The timing of maintenance is a key aspect of HPM, which determines the quality of highway maintenance.	12.The effects of the maintenance measures taken have a positive effect on managers' decision-making.	13.The cost of HPM constrains the quality and effectiveness of maintenance work.		14.The application of new technologies (new, advanced maintenance techniques, materials, facilities, etc.) is a key part of the maintenance work, which is very effective in improving the quality of maintenance.	15.Personnel skills (professional skills, qualifications, experience, etc. of personnel in the maintenance sector) are significant for the quality and effectiveness of maintenance work.	16.The use of maintenance data information (analysing, processing, storing) is also one of the important tasks in HPM.	17.The phenomena of few channels of access to maintenance information, poor quality of access, low efficiency of access, difficulties in information sharing, and information silos are all serious constraints to the improvement of the effectiveness of HPM management.		18.Excellent performance of maintenance machinery and equipment is important for HPM management.	19.The availability of materials for maintenance determines the success of HPM management.	20.The quality of the materials required for maintenance determines the quality and effectiveness of HPM.	21.The investment of funds required for maintenance is beneficial to the effectiveness of HPM management.	22.Benefits of maintenance reflect the quality of the effectiveness of HPM management.	23.Improvement in the efficiency of maintenance machinery has a significant effect on the effectiveness of HPM management.		24.The establishment of management systems is beneficial to the effectiveness of HPM management.	25.The implementation of management systems can better facilitate HPM management efforts.	26.Improvements in management systems have made HPM management more effective.		27.The more importance the government attaches to HPM, the more favourable it will be for HPM management.	28.Competition in the maintenance industry market is beneficial to the innovation of maintenance management mode, system, etc., and can promote the improvement of the effectiveness of maintenance management.	29.High speed traffic, unprofessional equipment and operations make HPM management work hazardous.	30.The climatic impact of the HPM project area is an important factor in the success of the project, while different maintenance strategies need to be developed for different climatic conditions.
4	4	4	4	5	4	4	4	4	4	4	5	5	5	5	5	5	5	5	5	5	5	5	5	5	5	5	4	4	4	4	4
4	4	4	4	4	3	3	3	3	3	3	4	4	4	4	4	4	4	4	4	4	4	4	4	4	4	4	3	3	3	3	3
4	4	4	4	4	4	4	4	4	4	4	4	4	4	4	4	4	4	4	4	4	4	4	4	4	4	4	4	4	4	4	4
4	4	4	4	4	5	5	5	5	5	5	4	4	4	4	4	4	4	4	4	4	4	4	4	4	4	4	5	5	5	5	5
3	3	3	3	3	3	3	3	3	3	3	3	3	3	3	3	3	3	3	3	3	3	3	3	3	3	3	3	3	3	3	3
5	5	5	5	5	5	5	5	5	5	5	5	5	5	5	5	5	5	5	5	5	5	5	5	5	5	5	5	5	5	5	5
3	3	3	3	3	5	5	5	5	5	5	5	5	5	5	5	5	5	5	5	5	5	5	5	5	5	5	5	5	5	5	5
4	4	4	4	4	5	5	5	5	5	5	5	5	5	5	5	5	5	5	5	5	5	5	5	5	5	5	3	3	3	3	3
3	3	3	3	3	4	4	4	4	4	4	3	3	3	3	3	4	4	4	4	4	4	4	4	4	4	4	4	4	4	4	4
3	3	3	3	3	4	4	4	4	4	4	5	5	5	5	5	4	4	4	4	4	4	4	4	4	4	4	4	4	4	4	4
4	4	4	4	4	3	3	3	3	3	3	4	4	4	4	4	4	4	4	4	4	4	4	3	3	3	3	4	4	4	4	4
4	4	4	4	4	3	3	3	3	3	3	3	3	3	3	3	3	3	3	3	3	3	3	4	4	4	4	4	4	4	4	4
1	1	1	1	1	5	5	5	5	5	5	5	5	5	5	5	5	5	5	5	5	5	5	5	5	5	5	5	5	5	5	5
4	4	4	4	4	4	4	4	4	4	4	4	4	4	4	4	4	4	4	4	4	4	4	4	4	4	4	4	4	4	4	4
4	4	4	4	4	4	4	4	4	4	4	4	4	4	4	4	4	4	4	4	4	4	4	4	4	4	4	4	4	4	4	4
4	4	4	4	4	4	4	4	4	4	4	4	4	4	4	4	4	4	4	4	4	4	4	4	4	4	4	4	4	4	4	4
4	4	4	4	4	4	4	4	4	4	4	4	4	4	4	4	4	4	4	4	4	4	4	4	4	4	4	4	4	4	4	4
5	5	5	5	5	5	5	5	5	5	5	5	5	5	5	5	5	5	5	5	5	5	5	5	5	5	5	5	5	5	5	5
5	5	5	5	5	4	4	4	4	4	4	4	4	4	4	4	4	4	4	4	4	4	4	4	4	4	4	4	4	4	4	4
4	4	4	4	4	4	4	4	4	4	4	4	4	4	4	4	5	5	5	5	5	5	5	4	4	4	4	5	5	5	5	5
3	3	3	3	3	4	4	4	4	4	4	4	4	4	4	4	4	4	4	4	4	4	4	4	4	4	4	4	4	4	4	4
4	4	4	4	4	5	5	5	5	5	5	5	5	5	5	5	5	5	5	5	5	5	5	4	4	4	4	4	4	4	4	4
2	2	2	2	2	4	4	4	4	4	4	5	5	5	5	5	4	4	4	4	4	4	4	4	4	4	4	4	4	4	4	4
3	3	3	3	3	4	4	4	4	4	4	4	4	4	4	4	4	4	4	4	4	4	4	4	4	4	4	4	4	4	4	4
3	3	3	3	3	5	5	5	5	5	5	4	4	4	4	4	3	3	3	3	3	3	3	4	4	4	4	3	3	3	3	3
5	5	5	5	5	5	5	5	5	5	5	5	5	5	5	5	5	5	5	5	5	5	5	5	5	5	5	5	5	5	5	5
3	3	3	3	3	4	4	4	4	4	4	4	4	4	4	4	3	3	3	3	3	3	3	3	3	3	3	3	3	3	3	3
4	4	4	4	4	4	4	4	4	4	4	4	4	4	4	4	4	4	4	4	4	4	4	4	4	4	4	4	4	4	4	4
1	1	1	1	1	1	1	1	1	1	1	2	2	2	2	2	1	1	1	1	1	1	1	2	2	2	2	5	5	5	5	5
4	4	4	4	4	5	5	5	5	5	5	5	5	5	5	5	3	3	3	3	3	3	3	5	5	5	5	4	4	4	4	4
3	3	3	3	3	3	3	3	3	3	3	3	3	3	3	3	3	3	3	3	3	3	3	4	4	4	4	3	3	3	3	3
5	5	5	5	5	5	5	5	5	5	5	5	5	5	5	5	5	5	5	5	5	5	5	5	5	5	5	5	5	5	5	5
5	5	5	5	5	4	4	4	4	4	4	5	5	5	5	5	4	4	4	4	4	4	4	4	4	4	4	4	4	4	4	4
4	4	4	4	4	4	4	4	4	4	4	3	3	3	3	3	4	4	4	4	4	4	4	4	4	4	4	4	4	4	4	4
4	4	4	4	4	4	4	4	4	4	4	4	4	4	4	4	3	3	3	3	3	3	3	5	5	5	5	2	2	2	2	2
4	4	4	4	4	5	5	5	5	5	5	4	4	4	4	4	5	5	5	5	5	5	5	5	5	5	5	5	5	5	5	5
3	3	3	3	3	5	5	5	5	5	5	5	5	5	5	5	4	4	4	4	4	4	4	4	4	4	4	4	4	4	4	4
3	3	3	3	3	4	4	4	4	4	4	4	4	4	4	4	4	4	4	4	4	4	4	4	4	4	4	4	4	4	4	4
4	4	4	4	4	3	3	3	3	3	3	3	3	3	3	3	4	4	4	4	4	4	4	4	4	4	4	5	5	5	5	5
3	3	3	3	3	5	5	5	5	5	5	4	4	4	4	4	4	4	4	4	4	4	4	5	5	5	5	5	5	5	5	5
3	3	3	3	3	4	4	4	4	4	4	4	4	4	4	4	4	4	4	4	4	4	4	4	4	4	4	4	4	4	4	4
5	5	5	5	5	4	4	4	4	4	4	4	4	4	4	4	4	4	4	4	4	4	4	4	4	4	4	4	4	4	4	4
3	3	3	3	3	4	4	4	4	4	4	4	4	4	4	4	4	4	4	4	4	4	4	4	4	4	4	4	4	4	4	4
3	3	3	3	3	3	3	3	3	3	3	5	5	5	5	5	5	5	5	5	5	5	5	4	4	4	4	4	4	4	4	4
4	4	4	4	4	5	5	5	5	5	5	4	4	4	4	4	3	3	3	3	3	3	3	4	4	4	4	5	5	5	5	5
4	4	4	4	4	4	4	4	4	4	4	5	5	5	5	5	4	4	4	4	4	4	4	3	3	3	3	5	5	5	5	5
4	4	4	4	4	4	4	4	4	4	4	4	4	4	4	4	4	4	4	4	4	4	4	4	4	4	4	4	4	4	4	4
4	4	4	4	4	4	4	4	4	4	4	4	4	4	4	4	4	4	4	4	4	4	4	4	4	4	4	4	4	4	4	4
4	4	4	4	4	4	4	4	4	4	4	4	4	4	4	4	4	4	4	4	4	4	4	4	4	4	4	5	5	5	5	5
3	3	3	3	3	4	4	4	4	4	4	5	5	5	5	5	5	5	5	5	5	5	5	4	4	4	4	5	5	5	5	5
5	5	5	5	5	5	5	5	5	5	5	5	5	5	5	5	5	4.5	4.75	4.625	4.6875	4.65625	4	4	4	4	4	4	4	4	4	4
3	3	3	3	3	4	4.5	4.25	4.375	4.6875	5	3	3	3	3	3	5	5	5	5	5	5	5	4	4	4	4	4	3.5	3.75	3.625	3
3	3	3	3	5	4	4.5	4.25	4.375	4.6875	5	5	5	5	5	5	4	4.5	4.25	4.375	4.3125	4.34375	5	4	4	4	4	4	4	4	4	4
3	3	3	3	3	3	3	3	3	3	3	3	3	3	3	3	3	3	3	3	3	3	3	3	3	3	3	3	3	3	3	3
2	3.5	2.75	3.125	5	4	4	4	4	4	4	4	4	4	4	4	5	4.5	4.75	4.625	4.6875	4.65625	4	4	4.5	4.25	5	5	4.5	4.75	4.625	4
3	3	3	3	3	3	3	3	3	3	3	3	3	3	3	3	3	3	3	3	3	3	3	3	3	3	3	3	3	3	3	3
4	4.5	4.25	4.375	5	4	4.5	4.25	4.375	4.6875	5	5	5	5	5	5	5	5	5	5	5	5	5	5	5	5	5	5	5	5	5	5
3	3.5	3.25	3.375	4	4	4	4	4	4	4	4	4	4	4	4	4	4	4	4	4	4	4	4	4	4	4	4	4	4	4	4
4	4	4	4	4	4	4	4	4	4	4	4	4	4	4	4	4	4	4	4	4	4	4	4	4	4	4	4	4	4	4	4
3	3	3	3	3	3	3	3	3	3	3	3	3	3	3	3	3	3	3	3	3	3	3	3	3	3	3	3	3	3	3	3
4	4	4	4	4	4	4	4	4	4	4	4	4	4	4	4	4	4	4	4	4	4	4	4	4	4	4	4	4	4	4	4
3	4	3.5	3.75	5	4	4.5	4.25	4.375	4.6875	5	4	4	4	4	4	4	3.5	3.75	3.625	3.6875	3.65625	3	4	3.5	3.75	3	4	3.5	3.75	3.625	3
3	3	3	3	3	3	3	3	3	3	3	4	4	4	4	4	4	3.5	3.75	3.625	3.6875	3.65625	3	4	4	4	4	4	4	4	4	4
3	3.5	3.25	3.375	4	4	4	4	4	4	4	4	4	4	4	4	4	4	4	4	4	4	4	4	4	4	4	4	4	4	4	4
3	3.5	3.25	3.375	4	4	4	4	4	4	4	4	4	4	4	4	4	4	4	4	4	4	4	4	4	4	4	4	4	4	4	4
3	3	3	3	3	3	3	3	3	3	3	3	3	3	3	3	3	3	3	3	3	3	3	3	3	3	3	3	3	3	3	3
4	4	4	4	4	4	4	4	4	4	4	5	5	5	5	5	5	5	5	5	5	5	5	4	4	4	4	4	4	4	4	4
3	4	3.5	3.75	5	4	4	4	4	4	4	5	5	5	5	5	5	5	5	5	5	5	5	5	5	5	5	4	4	4	4	4
4	4.5	4.25	4.375	5	5	5	5	5	5	5	5	5	5	5	5	5	5	5	5	5	5	5	5	5	5	5	5	5	5	5	5
4	3.5	3.75	3.625	3	5	5	5	5	5	5	2	2	2	2	2	4	4.5	4.25	4.375	4.3125	4.34375	5	5	5	5	5	5	5	5	5	5
4	3.5	3.75	3.625	3	4	4	4	4	4	4	4	4	4	4	4	4	4	4	4	4	4	4	4	4	4	4	4	4	4	4	4
3	3.5	3.25	3.375	4	4	4	4	4	4	4	4	4	4	4	4	4	4	4	4	4	4	4	4	4	4	4	4	4	4	4	4
4	4	4	4	4	4	4	4	4	4	4	4	4	4	4	4	4	4	4	4	4	4	4	3	4	3.5	5	4	4	4	4	4
4	4	4	4	4	2	3	2.5	2.75	3.375	4	4	4	4	4	4	4	4.5	4.25	4.375	4.3125	4.34375	5	4	3.5	3.75	3	4	4	4	4	4
3	4	3.5	3.75	5	4	4.5	4.25	4.375	4.6875	5	5	5	5	5	5	4	4	4	4	4	4	4	4	4.5	4.25	5	4	4	4	4	4
4	4	4	4	4	5	4.5	4.75	4.625	4.3125	4	4	4	4	4	4	3	4	3.5	3.75	3.625	3.6875	5	4	4	4	4	4	4	4	4	4
4	4	4	4	4	4	4	4	4	4	4	4	4	4	4	4	4	4	4	4	4	4	4	4	4	4	4	4	4	4	4	4
4	4	4	4	4	4	4	4	4	4	4	4	4	4	4	4	4	4	4	4	4	4	4	4	4	4	4	4	4	4	4	4
4	3	3.5	3.25	2	4	4.5	4.25	4.375	4.6875	5	3	4	3.5	3.75	5	4	4.5	4.25	4.375	4.3125	4.34375	5	4	4	4	4	4	4.5	4.25	4.375	5
4	4	4	4	4	4	4.5	4.25	4.375	4.6875	5	4	4.5	4.25	4.375	5	4	4.5	4.25	4.375	4.3125	4.34375	5	4	4	4	4	4	4.5	4.25	4.375	5
5	5	5	5	5	5	5	5	5	5	5	5	5	5	5	5	5	5	5	5	5	5	5	5	5	5	5	5	5	5	5	5
5	5	5	5	5	5	5	5	5	5	5	5	5	5	5	5	5	5	5	5	5	5	5	5	5	5	5	5	5	5	5	5
5	5	5	5	5	5	5	5	5	5	5	5	5	5	5	5	5	5	5	5	5	5	5	5	5	5	5	5	5	5	5	5
4	4.5	4.25	4.375	5	5	5	5	5	5	5	5	5	5	5	5	5	5	5	5	5	5	5	5	5	5	5	5	5	5	5	5
5	5	5	5	5	5	5	5	5	5	5	5	5	5	5	5	5	5	5	5	5	5	5	4	4.5	4.25	5	5	5	5	5	5
4	4	4	4	4	4	4.5	4.25	4.375	4.6875	5	4	4.5	4.25	4.375	5	4	4.5	4.25	4.375	4.3125	4.34375	5	5	5	5	5	5	5	5	5	5
5	5	5	5	5	5	5	5	5	5	5	5	5	5	5	5	5	5	5	5	5	5	5	5	5	5	5	5	5	5	5	5
4	4.5	4.25	4.375	5	5	5	5	5	5	5	5	5	5	5	5	5	5	5	5	5	5	5	5	5	5	5	5	5	5	5	5
3	3.5	3.25	3.375	4	5	4	4.5	4.25	3.625	3	4	3.5	3.75	3.625	3	4	3.5	3.75	3.625	3.6875	3.65625	3	5	4	4.5	3	5	4	4.5	4.25	3
4	4.5	4.25	4.375	5	4	4	4	4	4	4	4	4	4	4	4	4	4	4	4	4	4	4	4	4	4	4	4	4	4	4	4
4	4.5	4.25	4.375	5	5	4.5	4.75	4.625	4.3125	4	2	3	2.5	2.75	4	4	4	4	4	4	4	4	4	4	4	4	4	4	4	4	4
4	4	4	4	4	4	4	4	4	4	4	4	4	4	4	4	4	4	4	4	4	4	4	4	4	4	4	4	4	4	4	4
3	4	3.5	3.75	5	4	3.5	3.75	3.625	3.3125	3	4	3.5	3.75	3.625	3	5	4	4.5	4.25	4.375	4.3125	3	4	3.5	3.75	3	5	4	4.5	4.25	3
1	1.5	1.25	1.375	2	3	2	2.5	2.25	1.625	1	3	2	2.5	2.25	1	3	2	2.5	2.25	2.375	2.3125	1	3	2	2.5	1	3	2	2.5	2.25	1
3	3.5	3.25	3.375	4	4	3.5	3.75	3.625	3.3125	3	4	3.5	3.75	3.625	3	4	3.5	3.75	3.625	3.6875	3.65625	3	4	3.5	3.75	3	4	3.5	3.75	3.625	3
3	3	3	3	3	4	3.5	3.75	3.625	3.3125	3	4	3.5	3.75	3.625	3	4	3.5	3.75	3.625	3.6875	3.65625	3	3	3	3	3	3	3	3	3	3
4	4	4	4	4	3	3.5	3.25	3.375	3.6875	4	4	4	4	4	4	4	4	4	4	4	4	4	4	4	4	4	3	3.5	3.25	3.375	4
5	4.5	4.75	4.625	4	4	4.5	4.25	4.375	4.6875	5	4	4.5	4.25	4.375	5	5	5	5	5	5	5	5	5	5	5	5	5	5	5	5	5
3	3	3	3	3	3	3	3	3	3	3	4	3.5	3.75	3.625	3	4	3.5	3.75	3.625	3.6875	3.65625	3	4	3.5	3.75	3	3	3	3	3	3
5	5	5	5	5	5	5	5	5	5	5	5	5	5	5	5	5	5	5	5	5	5	5	5	5	5	5	5	5	5	5	5
4	4.5	4.25	4.375	5	5	4.5	4.75	4.625	4.3125	4	5	4.5	4.75	4.625	4	5	4.5	4.75	4.625	4.6875	4.65625	4	4	4	4	4	4	4	4	4	4
3	4	3.5	3.75	5	3	3	3	3	3	3	3	3	3	3	3	3	3	3	3	3	3	3	4	3.5	3.75	3	5	4	4.5	4.25	3
4	4	4	4	4	4	4	4	4	4	4	4	4	4	4	4	4	4	4	4	4	4	4	4	4	4	4	4	4	4	4	4
4	4	4	4	4	3	3.5	3.25	3.375	3.6875	4	4	4	4	4	4	4	4.5	4.25	4.375	4.3125	4.34375	5	5	5	5	5	4	4	4	4	4
4	4	4	4	4	4	4	4	4	4	4	4	4	4	4	4	3	3.5	3.25	3.375	3.3125	3.34375	4	4	4	4	4	4	4	4	4	4
5	5	5	5	5	5	5	5	5	5	5	5	5	5	5	5	5	5	5	5	5	5	5	5	5	5	5	5	5	5	5	5
4	4.5	4.25	4.375	5	5	4.5	4.75	4.625	4.3125	4	5	4.5	4.75	4.625	4	5	5	5	5	5	5	5	5	4.5	4.75	4	5	4.5	4.75	4.625	4
5	4.5	4.75	4.625	4	4	4.5	4.25	4.375	4.6875	5	5	5	5	5	5	5	4.5	4.75	4.625	4.6875	4.65625	4	5	5	5	5	5	5	5	5	5
4	4	4	4	4	4	4	4	4	4	4	3	3.5	3.25	3.375	4	4	4	4	4	4	4	4	4	3.5	3.75	3	3	3.5	3.25	3.375	4
1	3	2	2.5	5	5	3	4	3.5	2.25	1	5	5	5	5	5	5	5	5	5	5	5	5	5	5	5	5	5	5	5	5	5
3	3.5	3.25	3.375	4	4	3.5	3.75	3.625	3.3125	3	4	4	4	4	4	4	4	4	4	4	4	4	4	4	4	4	4	4	4	4	4
4	4.5	4.25	4.375	5	5	4.5	4.75	4.625	4.3125	4	4	4	4	4	4	5	4.5	4.75	4.625	4.6875	4.65625	4	5	5	5	5	5	5	5	5	5
4	4	4	4	4	4	4	4	4	4	4	4	4	4	4	4	4	4	4	4	4	4	4	4	4	4	4	4	4	4	4	4
5	5	5	5	5	5	5	5	5	5	5	5	5	5	5	5	5	5	5	5	5	5	5	5	5	5	5	5	5	5	5	5
4	4	4	4	4	4	4	4	4	4	4	4	4	4	4	4	4	4	4	4	4	4	4	4	4	4	4	4	4	4	4	4
4	4	4	4	4	4	4	4	4	4	4	3	3	3	3	3	3	3	3	3	3	3	3	4	4	4	4	4	4	4	4	4
4	3.5	3.75	3.625	3	3	3.5	3.25	3.375	3.6875	4	4	4	4	4	4	5	4.5	4.75	4.625	4.6875	4.65625	4	5	4.5	4.75	4	3	3	3	3	3
4	4	4	4	4	5	4.5	4.75	4.625	4.3125	4	5	5	5	5	5	5	4.5	4.75	4.625	4.6875	4.65625	4	4	4.5	4.25	5	5	4.5	4.75	4.625	4
4	4	4	4	4	3	3.5	3.25	3.375	3.6875	4	4	4	4	4	4	5	4.5	4.75	4.625	4.6875	4.65625	4	4	3.5	3.75	3	4	4	4	4	4
4	3.5	3.75	3.625	3	4	4	4	4	4	4	4	4	4	4	4	4	4	4	4	4	4	4	3	3.5	3.25	4	4	4	4	4	4
4	4.5	4.25	4.375	5	4	4	4	4	4	4	4	4	4	4	4	4	4	4	4	4	4	4	4	4	4	4	4	4.5	4.25	4.375	5
4	4	4	4	4	3	3.5	3.25	3.375	3.6875	4	4	4	4	4	4	3	3.5	3.25	3.375	3.3125	3.34375	4	4	4.5	4.25	5	4	4.5	4.25	4.375	5
4	4	4	4	4	5	5	5	5	5	5	3	3	3	3	3	4	4	4	4	4	4	4	5	4.5	4.75	4	4	4	4	4	4
4	4.5	4.25	4.375	5	5	4.5	4.75	4.625	4.3125	4	5	5	5	5	5	5	4.5	4.75	4.625	4.6875	4.65625	4	5	5	5	5	4	4.5	4.25	4.375	5
4	4.5	4.25	4.375	5	5	5	5	5	5	5	4	4	4	4	4	4	4	4	4	4	4	4	4	4	4	4	4	4	4	4	4
4	4	4	4	4	4	4	4	4	4	4	4	4	4	4	4	4	4	4	4	4	4	4	4	4	4	4	4	4	4	4	4
4	4	4	4	4	4	4	4	4	4	4	4	4	4	4	4	4	4	4	4	4	4	4	4	4	4	4	4	4	4	4	4
4	4	4	4	4	4	4	4	4	4	4	4	4	4	4	4	4	4	4	4	4	4	4	4	4	4	4	4	4	4	4	4
5	5	5	5	5	5	5	5	5	5	5	3	3	3	3	3	5	5	5	5	5	5	5	4	4	4	4	5	5	5	5	5
4	4.5	4.25	4.375	5	5	5	5	5	5	5	3	3	3	3	3	3	3.5	3.25	3.375	3.3125	3.34375	4	4	4	4	4	5	4.5	4.75	4.625	4
3	4	3.5	3.75	5	4	4	4	4	4	4	3	3	3	3	3	3	3	3	3	3	3	3	4	4	4	4	4	4.5	4.25	4.375	5
5	5	5	5	5	5	5	5	5	5	5	5	5	5	5	5	4	4	4	4	4	4	4	4	4	4	4	5	5	5	5	5
4	4.5	4.25	4.375	5	5	5	5	5	5	5	3	3	3	3	3	4	4.5	4.25	4.375	4.3125	4.34375	5	4	4.5	4.25	5	4	4	4	4	4
4	3.5	3.75	3.625	3	4	3.5	3.75	3.625	3.3125	3	2	2	2	2	2	4	3.5	3.75	3.625	3.6875	3.65625	3	4	3.5	3.75	3	2	3	2.5	2.75	4
5	5	5	5	5	5	5	5	5	5	5	5	5	5	5	5	5	5	5	5	5	5	5	5	5	5	5	5	5	5	5	5
5	5	5	5	5	5	5	5	5	5	5	5	5	5	5	5	5	5	5	5	5	5	5	5	5	5	5	5	5	5	5	5
5	5	5	5	5	5	5	5	5	5	5	5	5	5	5	5	5	5	5	5	5	5	5	5	5	5	5	5	5	5	5	5
4	4	4	4	4	4	4.5	4.25	4.375	4.6875	5	4	4	4	4	4	4	4	4	4	4	4	4	5	4.5	4.75	4	4	4.5	4.25	4.375	5
4	4	4	4	4	4	4	4	4	4	4	3	3	3	3	3	4	4	4	4	4	4	4	4	4	4	4	4	4	4	4	4
5	4.5	4.75	4.625	4	4	4	4	4	4	4	5	5	5	5	5	4	4	4	4	4	4	4	4	4	4	4	4	4.5	4.25	4.375	5
3	3	3	3	3	3	3	3	3	3	3	3	3	3	3	3	3	3	3	3	3	3	3	3	3	3	3	3	3	3	3	3
4	3.5	3.75	3.625	3	4	4	4	4	4	4	3	3	3	3	3	5	4.5	4.75	4.625	4.6875	4.65625	4	3	3.5	3.25	4	4	4.5	4.25	4.375	5
4	4.5	4.25	4.375	5	4	4.5	4.25	4.375	4.6875	5	5	5	5	5	5	4	4.5	4.25	4.375	4.3125	4.34375	5	5	5	5	5	5	5	5	5	5
4	4.5	4.25	4.375	5	4	4.5	4.25	4.375	4.6875	5	5	5	5	5	5	5	5	5	5	5	5	5	4	4.5	4.25	5	4	4.5	4.25	4.375	5
4	4	4	4	4	5	5	5	5	5	5	4	4	4	4	4	4	4.5	4.25	4.375	4.3125	4.34375	5	4	4.5	4.25	5	4	4.5	4.25	4.375	5
4	4.5	4.25	4.375	5	5	4.5	4.75	4.625	4.3125	4	5	5	5	5	5	5	5	5	5	5	5	5	5	5	5	5	5	5	5	5	5
5	5	5	5	5	4	4.5	4.25	4.375	4.6875	5	4	4	4	4	4	4	4.5	4.25	4.375	4.3125	4.34375	5	5	5	5	5	5	5	5	5	5
4	4.5	4.25	4.375	5	5	5	5	5	5	5	5	5	5	5	5	5	5	5	5	5	5	5	4	4.5	4.25	5	5	5	5	5	5
5	4.5	4.75	4.625	4	5	5	5	5	5	5	4	4	4	4	4	4	4.5	4.25	4.375	4.3125	4.34375	5	4	4.5	4.25	5	5	4.5	4.75	4.625	4
5	5	5	5	5	5	5	5	5	5	5	5	5	5	5	5	5	5	5	5	5	5	5	5	5	5	5	5	5	5	5	5
